# Supplementary material for: Endohedral boron-doped scandium clusters BmScn−m+/0 (m = 2–3, n = 3–13): triangular – linear rearrangement of the B3 dopant
Source: Royal Society of Chemistry journal article supplement (doi:10.1039/d4dt03054k), 2025-01-01
Supplement: d4dt03054k1.pdf [file d4dt03054k1.pdf]

## Supplementary Information (SI)

### **Endohedral Boron-doped Scandium Clusters $B_mSc_{n-m}^{+/0}$ ( $m = 2 - 3$ , $n = 3-13$ ): Triangular - Linear Rearrangement of the $B_3$ Dopant**

**Bao Ngan Nguyen-Ha,<sup>1,2</sup> Nguyen Minh Tam,<sup>3</sup> My Phuong Pham-Ho,<sup>1,2,\*</sup> Minh Tho Nguyen<sup>4,5</sup>**

<sup>1</sup> Faculty of Chemical Engineering, Ho Chi Minh City University of Technology (HCMUT), 268 Ly Thuong Kiet Street, District 10, Ho Chi Minh City, Vietnam. Emails: [nhbngan.sdh232@hcmut.edu.vn](mailto:nhbngan.sdh232@hcmut.edu.vn), [phmpuong@hcmut.edu.vn](mailto:phmpuong@hcmut.edu.vn)

<sup>2</sup> Vietnam National University Ho Chi Minh City, Linh Trung Ward, Thu Duc City, Ho Chi Minh City, Vietnam

<sup>3</sup> Faculty of Basic Sciences, University of Phan Thiet, 225 Nguyen Thong, Phan Thiet City, Binh Thuan, Vietnam

<sup>4</sup> Laboratory for Chemical Computation and Modeling, Institute for Computational Science and Artificial Intelligence, Van Lang University, Ho Chi Minh City, Vietnam

<sup>5</sup> Faculty of Applied Technology, School of Technology, Van Lang University, Ho Chi Minh City, Vietnam

#### **Content**

- The Structures, Multiplicities (M, in bracket) and Relative Energies (rE, kcal.mol<sup>-1</sup>) of the lowest-lying cationic  $B_mSc_{n-m}^+$  ( $m = 2-3$ ,  $n = 3-13$ ) clusters calculated at the PBE/ Def2-TZVP theory method (Figures S1 and S2).
- Structural evolution of the  $B_mSc_{n-m}^{+/0}$  ( $m = 0 - 3$ ;  $n = 3-13$ ) clusters (Figure S3).
- The molecular orbital (MO) diagram of the **n.8.D.1**, **n.9.D.2** and **n.10.D.2** isomers (Figures S4 - S7).
- Calculated density of states (DOS) for the **n.8.D.1** and **n.9.D.2** isomers (Figures S8 and S9).
- Adiabatic ionization energy of the  $B_mSc_{n-m}^{+/0}$  ( $m = 0-3$ ,  $n = 3-13$ ) clusters (Figure S10).
- Natural Electron Configuration (NEC) and Natural Charge of the **n.8.D.1**, **n.9.D.2**, **n.9.D.3**, **n.10.D.1** and **n.10.D.2** isomers (Table S1 and S2).
- Coordinates of the lowest-lying  $B_mSc_{n-m}^+$  ( $m = 2-3$ ,  $n = 3-13$ ) clusters (Pages 14-22).

| <i>Isomer</i>                                                                                          | <i>(M) - rE</i>                          | <i>Isomer</i>                                                                                          | <i>(M) - rE</i>                | <i>Isomer</i>                                                                                         | <i>(M) - rE</i>    |
|--------------------------------------------------------------------------------------------------------|------------------------------------------|--------------------------------------------------------------------------------------------------------|--------------------------------|-------------------------------------------------------------------------------------------------------|--------------------|
| <br><b>c.1.C.1</b>    | (3) 0.0                                  | <br><b>c.1.C.2</b>    | (1) 1.4<br>(3) 14.8            |                                                                                                       |                    |
| <br><b>c.2.C.1.</b>   | (2) 0.0<br>(4) 20.3                      | <br><b>c.2.C.2</b>    | (2) 5.8<br>(4) 20.8            |                                                                                                       |                    |
| <br><b>c.3.C.1</b>    | (1) 0.0<br>(3) 3.2                       | <br><b>c.3.C.2</b>    | (5) 13.1                       | <br><b>c.3.C.3</b> | (1) 17.8           |
| <br><b>c.4.C.1</b>    | (2) 0.0<br>(4) 3.7<br>(6) 9.9            | <br><b>c.4.C.2</b>    | (2) 3.5<br>(4) 6.9             |                                                                                                       |                    |
| <br><b>c.5.C.1</b>    | (1) 0.0<br>(3) 2.3                       | <br><b>c.5.C.2</b>    | (3) 1.2<br>(5) 2.1             | <br><b>c.5.C.3</b> | (5) 5.3<br>(3) 5.5 |
| <br><b>c.6.C.1</b>    | (2) 0.0<br>(4) 1.6<br>(6) 3.2            | <br><b>c.6.C.2</b>    | (2) 2.5                        | <br><b>c.6.C.3</b> | (4) 3.0            |
| <br><b>c.7.C.1</b>  | (5) 0.0<br>(3) 1.8<br>(7) 3.7            | <br><b>c.7.C.2</b>  | (5) 2.8<br>(3) 4.4             |                                                                                                       |                    |
| <br><b>c.8.C.1</b>  | (6) 0.0<br>(4) 2.8<br>(8) 3.5            | <br><b>c.8.C.2</b>  | (6) 0.5<br>(2) 0.9<br>(4) 1.2  |                                                                                                       |                    |
| <br><b>c.9.C.1</b>  | (3) 0.0<br>(5) 2.1<br>(7) 2.4<br>(1) 2.4 |                                                                                                        |                                |                                                                                                       |                    |
| <br><b>c.10.C.1</b> | (2) 0.0<br>(4) 0.7<br>(6) 1.2<br>(8) 1.4 | <br><b>c.10.C.2</b> | (8) 0.2<br>(6) 0.7<br>(10) 1.4 |                                                                                                       |                    |
| <br><b>c.11.C.1</b> | (7) 0.0<br>(9) 0.7<br>(5) 1.4<br>(3) 2.3 |                                                                                                        |                                |                                                                                                       |                    |

**Figure S1:** The Structures, Multiplicities (*M*, in bracket) and Relative Energies (*rE*, kcal.mol<sup>-1</sup>) of the lowest-lying cationic B<sub>2</sub>Sc<sub>n-2</sub><sup>+</sup> (*n* = 3-13) clusters calculated at the PBE/ Def2-TZVP theory method.

| <i>Isomer</i>                                                                                          | <i>(M) - rE</i>                          | <i>Isomer</i>                                                                                          | <i>(M) - rE</i>                          | <i>Isomer</i>                                                                                            | <i>(M) - rE</i>                          |
|--------------------------------------------------------------------------------------------------------|------------------------------------------|--------------------------------------------------------------------------------------------------------|------------------------------------------|----------------------------------------------------------------------------------------------------------|------------------------------------------|
| 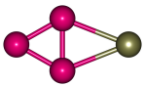<br><b>c.1.D.1</b>    | (2) 0.0<br>(4) 12.0                      | <br><b>c.1.D.2</b>    | (2) 0.0<br>(4) 23.5                      |                                                                                                          |                                          |
| <br><b>c.2.D.1</b>    | (1) 0.0<br>(3) 15.9                      | <br><b>c.2.D.2</b>    | (1) 0.7<br>(3) 9.5                       |                                                                                                          |                                          |
| <br><b>c.3.D.1</b>    | (2) 0.0<br>(4) 7.8                       | <br><b>c.3.D.2</b>    | (2) 0.2<br>(4) 4.6                       |                                                                                                          |                                          |
| <br><b>c.4.D.1</b>    | (1) 0.0<br>(3) 7.4                       | <br><b>c.4.D.2</b>    | (1) 6.5                                  | <br><b>c.4.D.3</b>    | (1) 6.9                                  |
| <br><b>c.5.D.1</b>    | (2) 0.0<br>(4) 6.9                       | <br><b>c.5.D.2</b>    | (4) 0.5<br>(2) 0.9                       |                                                                                                          |                                          |
| <br><b>c.6.D.1</b>   | (3) 0.0<br>(1) 4.4<br>(5) 4.6            | <br><b>c.6.D.2</b>   | (7) 8.5<br>(5) 9.2<br>(3) 10.6           |                                                                                                          |                                          |
| <br><b>c.7.D.1</b>  | (2) 0.0<br>(4) 1.8<br>(6) 5.3            | <br><b>c.7.D.2</b>  | (4) 7.6<br>(2) 9.9                       | <br><b>c.7.D.3</b>  | (2) 11.3                                 |
| <br><b>c.8.D.1</b>  | (1) 0.0<br>(3) 3.2<br>(5) 4.4            | <br><b>c.8.D.2</b>  | (5) 0.1<br>(3) 1.1<br>(7) 2.3<br>(1) 5.5 |                                                                                                          |                                          |
| <br><b>c.9.D.1</b>  | (6) 0.0<br>(4) 0.2<br>(2) 0.5            | <br><b>c.9.D.2</b>  | (6) 0.5<br>(4) 0.9<br>(2) 1.1            | <br><b>c.9.D.3</b>  | (8) 3.2<br>(6) 3.9                       |
| <br><b>c.10.D.1</b> | (5) 0.0<br>(3) 0.7<br>(7) 1.4<br>(9) 2.3 | <br><b>c.10.D.2</b> | (9) 0.7<br>(7) 1.4<br>(5) 1.8            | <br><b>c.10.D.3</b> | (7) 0.9<br>(3) 1.8<br>(5) 1.8<br>(9) 6.0 |

**Figure S2:** The Structures, Multiplicities (*M*, in bracket) and Relative Energies (*rE*, kcal.mol<sup>-1</sup>) of the lowest-lying cationic B<sub>3</sub>Sc<sub>*n*-3</sub><sup>+</sup> (*n* = 4-13) clusters calculated at the PBE/ Def2-TZVP theory method.

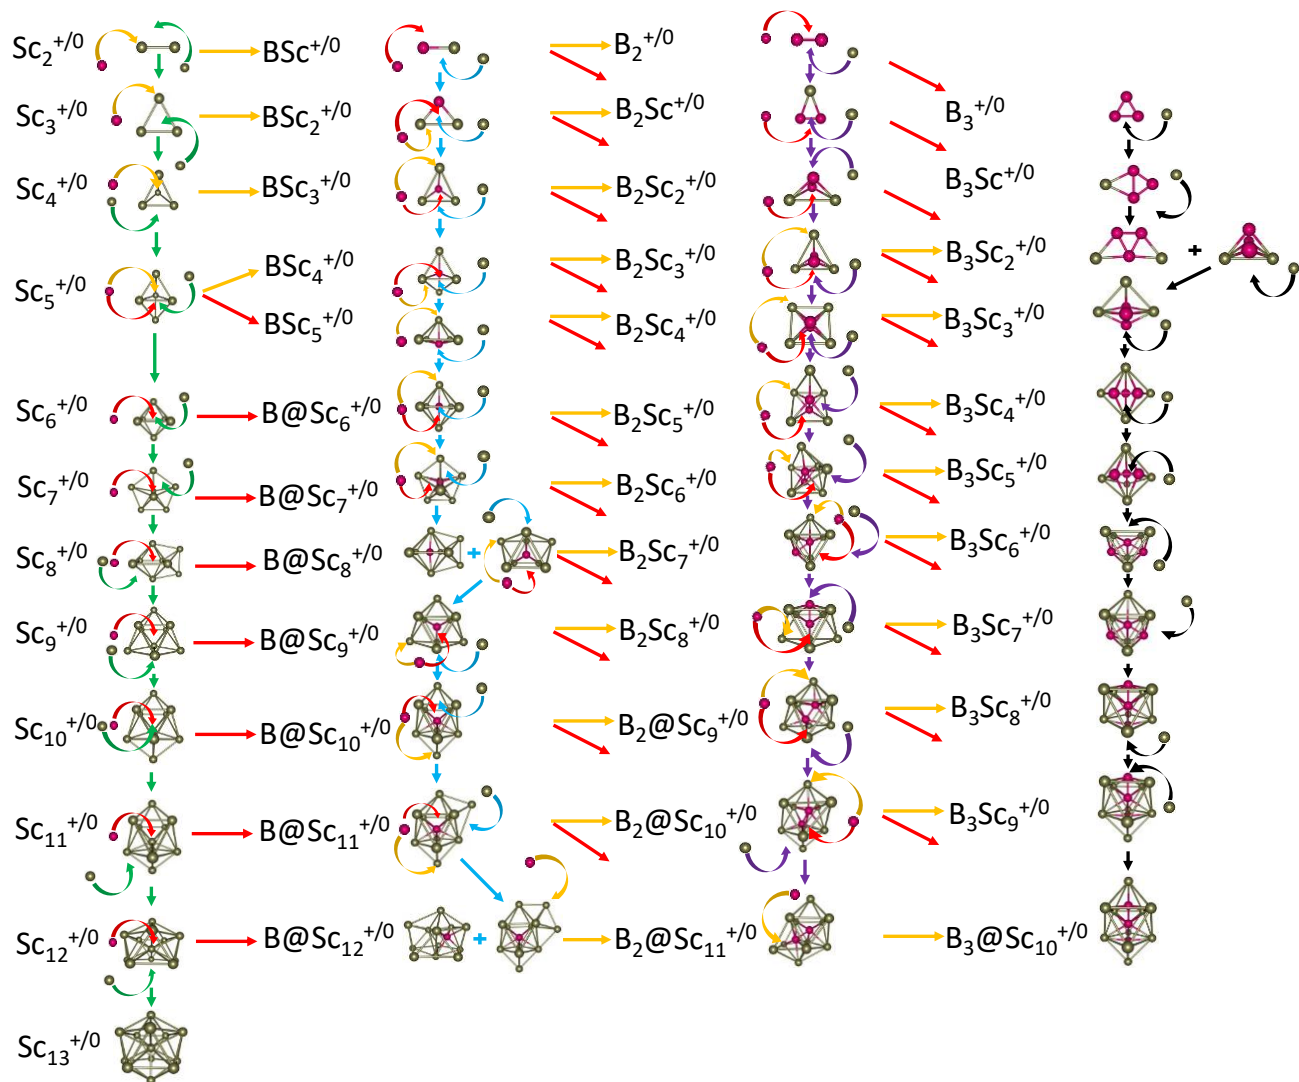

**Figure S3:** Structural evolution of the  $B_mSc_{n-m}^{+/0}$  clusters ( $m = 0 - 3$ ;  $n = 3-13$ ). Green, blue, violet and black arrows illustrate the stepwise structural changes by adding one Sc atom to the  $B_mSc_{n-m}^{+/0}$  clusters with  $m = 0, 1, 2$  and  $3$ , respectively. The  $B@Sc_n^{+/0}$  cluster are referenced from Ref.1. Yellow and red arrows present trends in substitution and addition of B atom into the clusters, respectively.

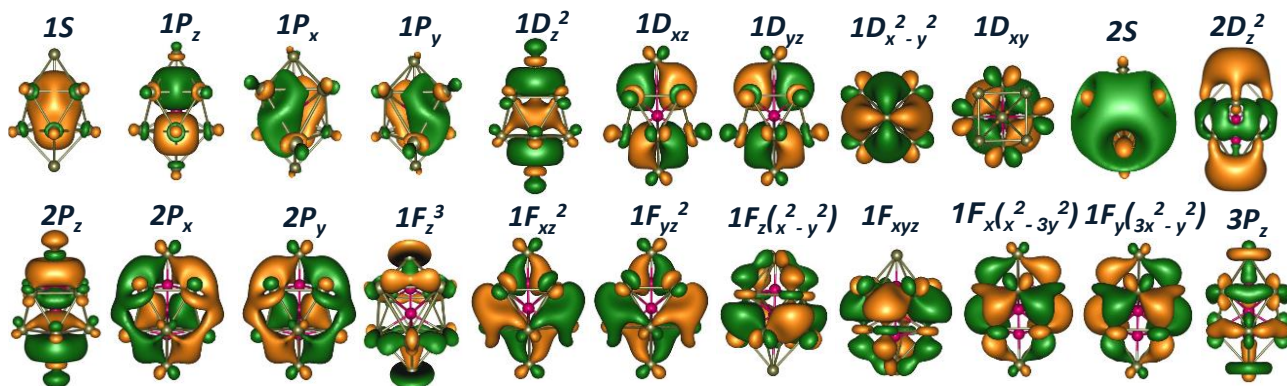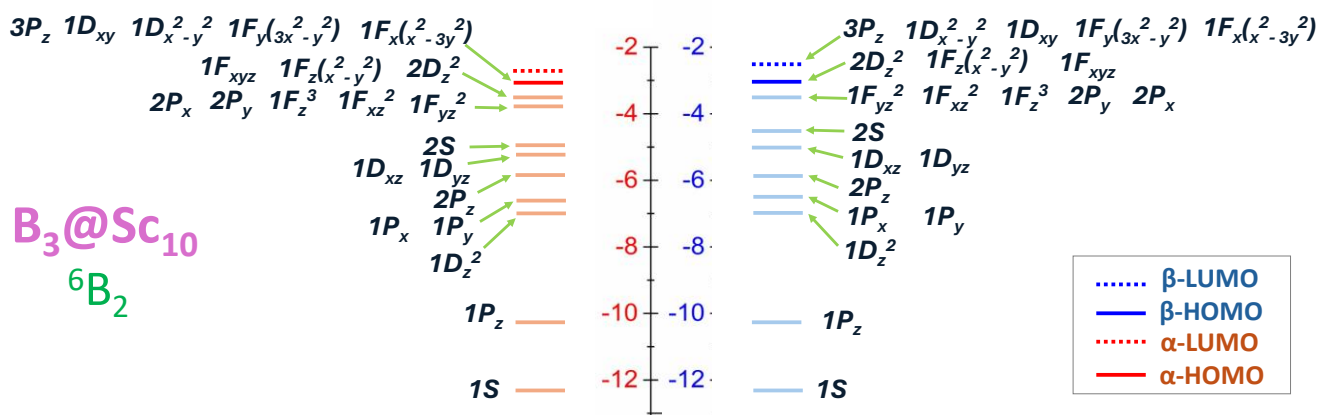

**Figure S4:** Energy levels of molecular orbitals (MOs) of **n.10.D.1** in its  ${}^6B_2$  electronic ground state (PBE/Def2-TZVP).

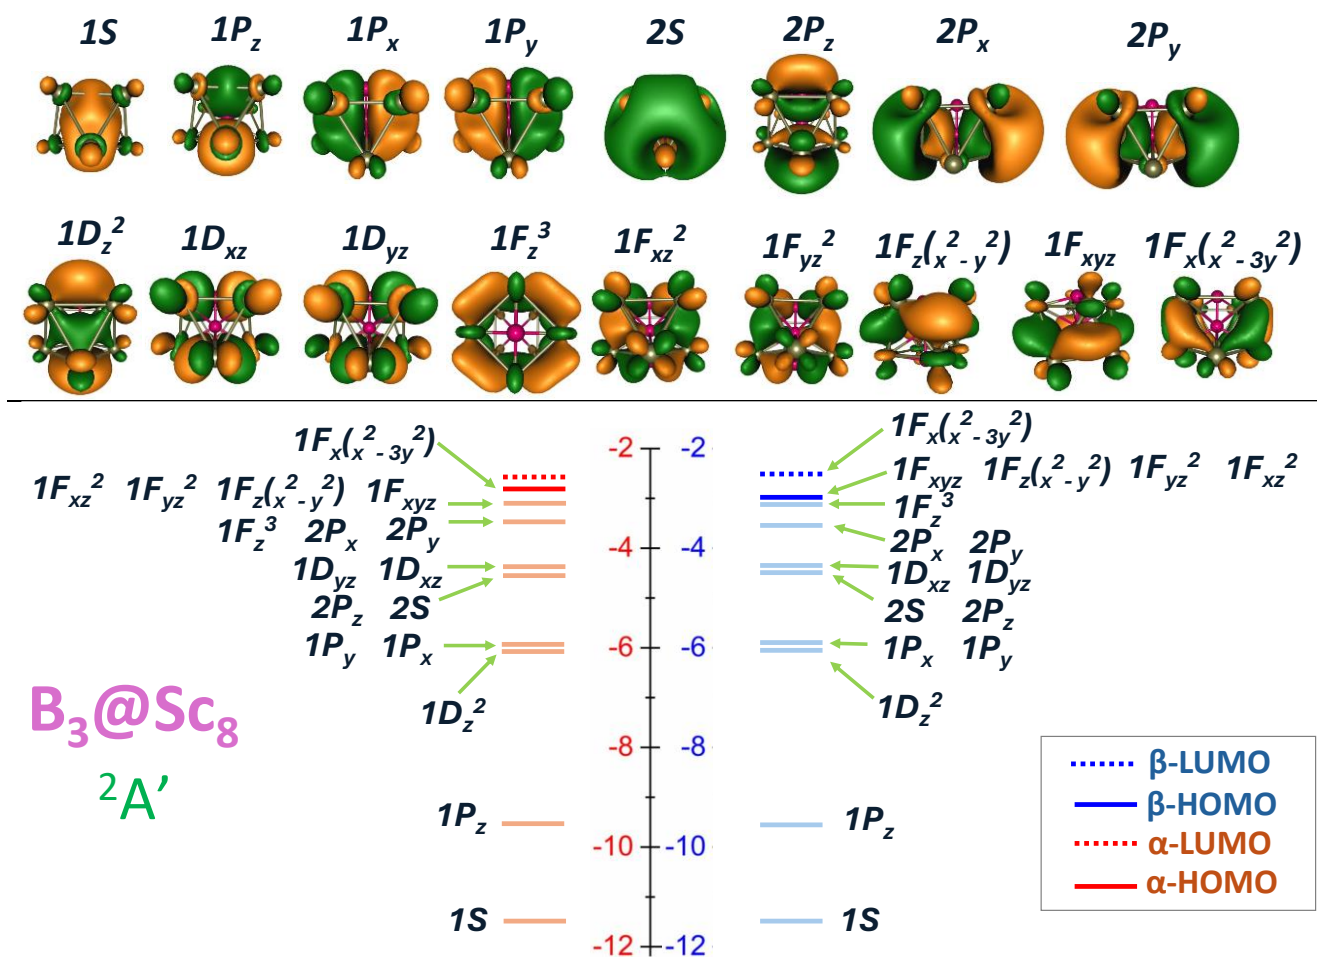

**Figure S5:** Energy levels of molecular orbitals (MOs) of **n.8.D.1** in its  $^2A'$  electronic ground state, PBE/ Def2-TZVP.

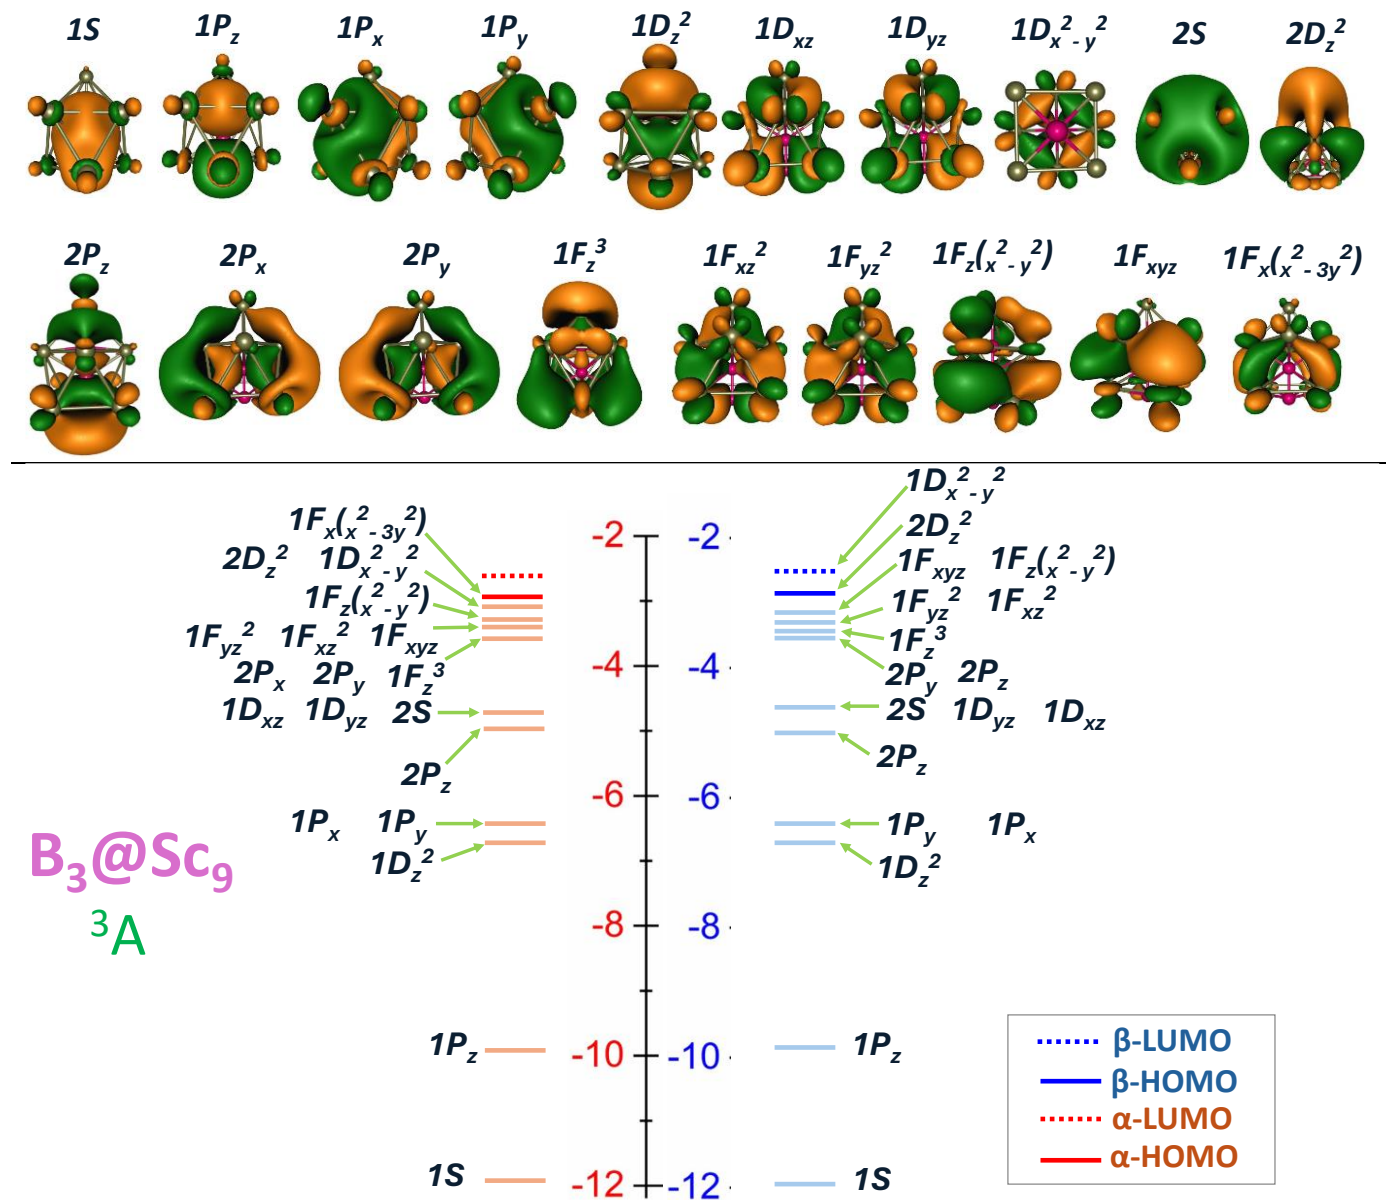

**Figure S6:** Energy levels of molecular orbitals (MOs) of **n.9.D.2** in its  $^3A$  electronic ground state,

PBE/ Def2-TZVP.

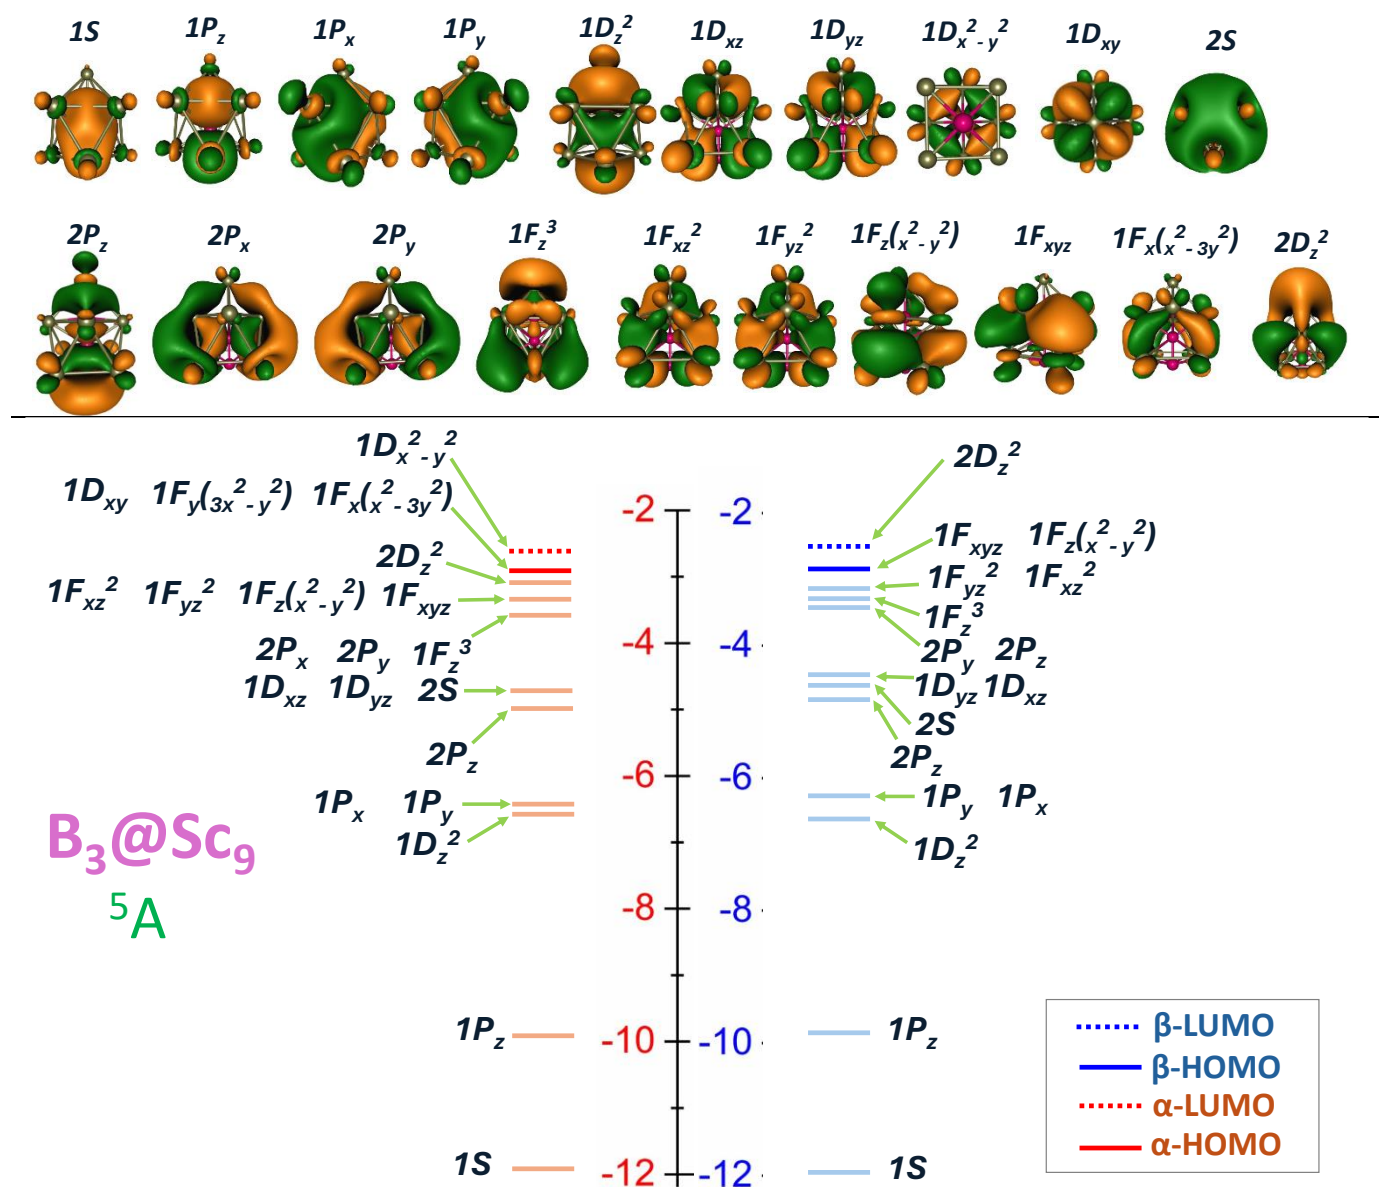

Figure S7: Energy levels of molecular orbitals (MOs) of **n.9.D.2** in its  $^5A$  electronic ground state, PBE/ Def2-TZVP.



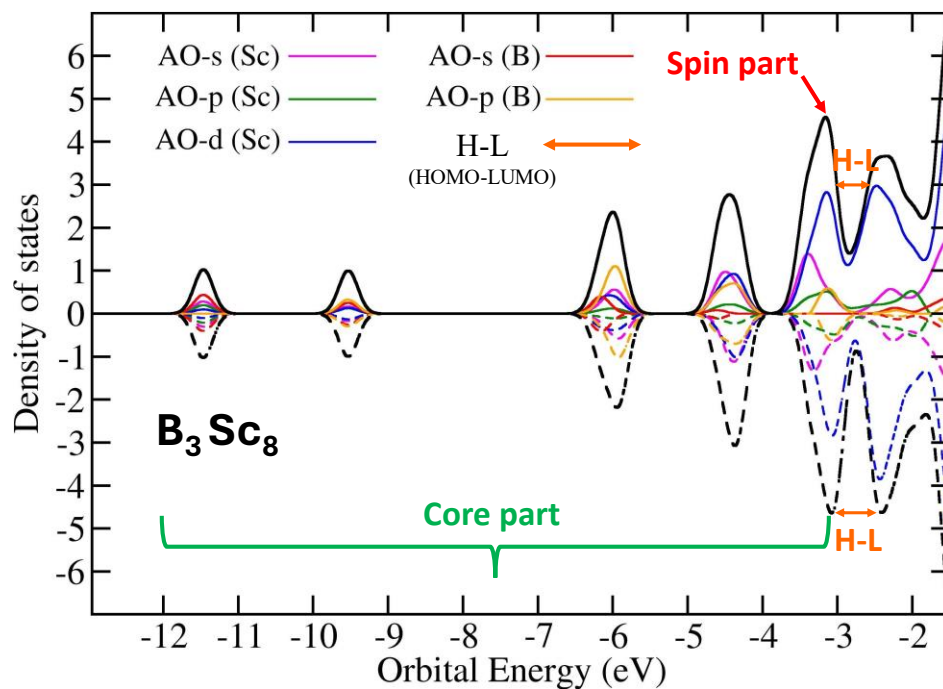

**Figure S8.** Calculated density of states (DOS) for the **n.8.D.1** isomer at  $^2A'$  electronic state. Positive and negative DOS represent spin-up and spin-down electrons, respectively.

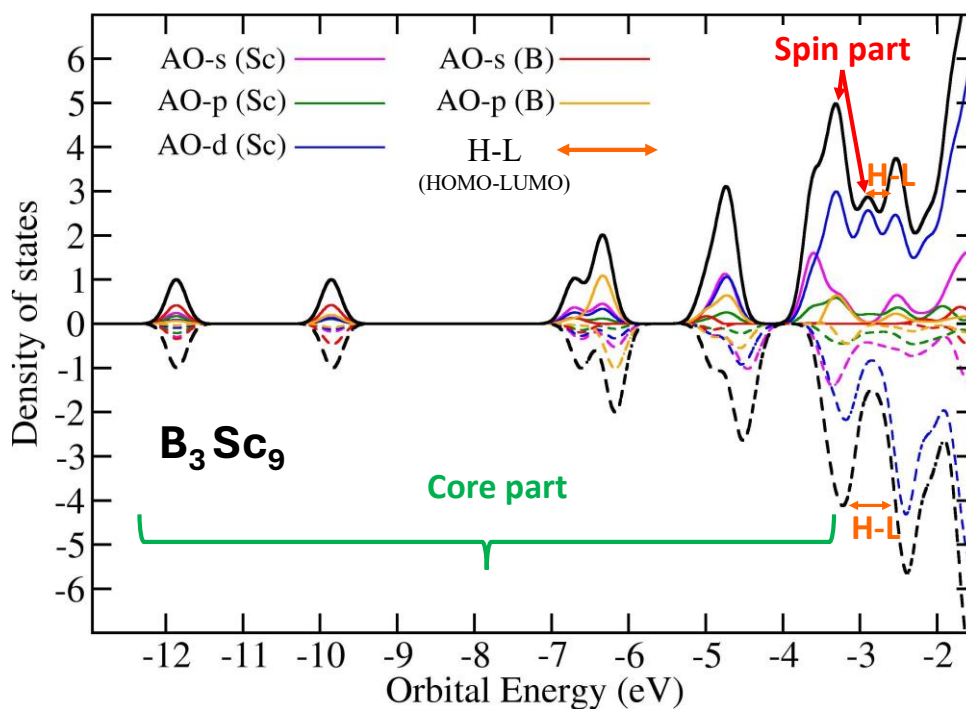

**Figure S9.** Calculated density of states (DOS) for the **n.9.D.2** isomer at  $^3A$  electronic state. Positive and negative DOS represent spin-up and spin-down electrons, respectively.

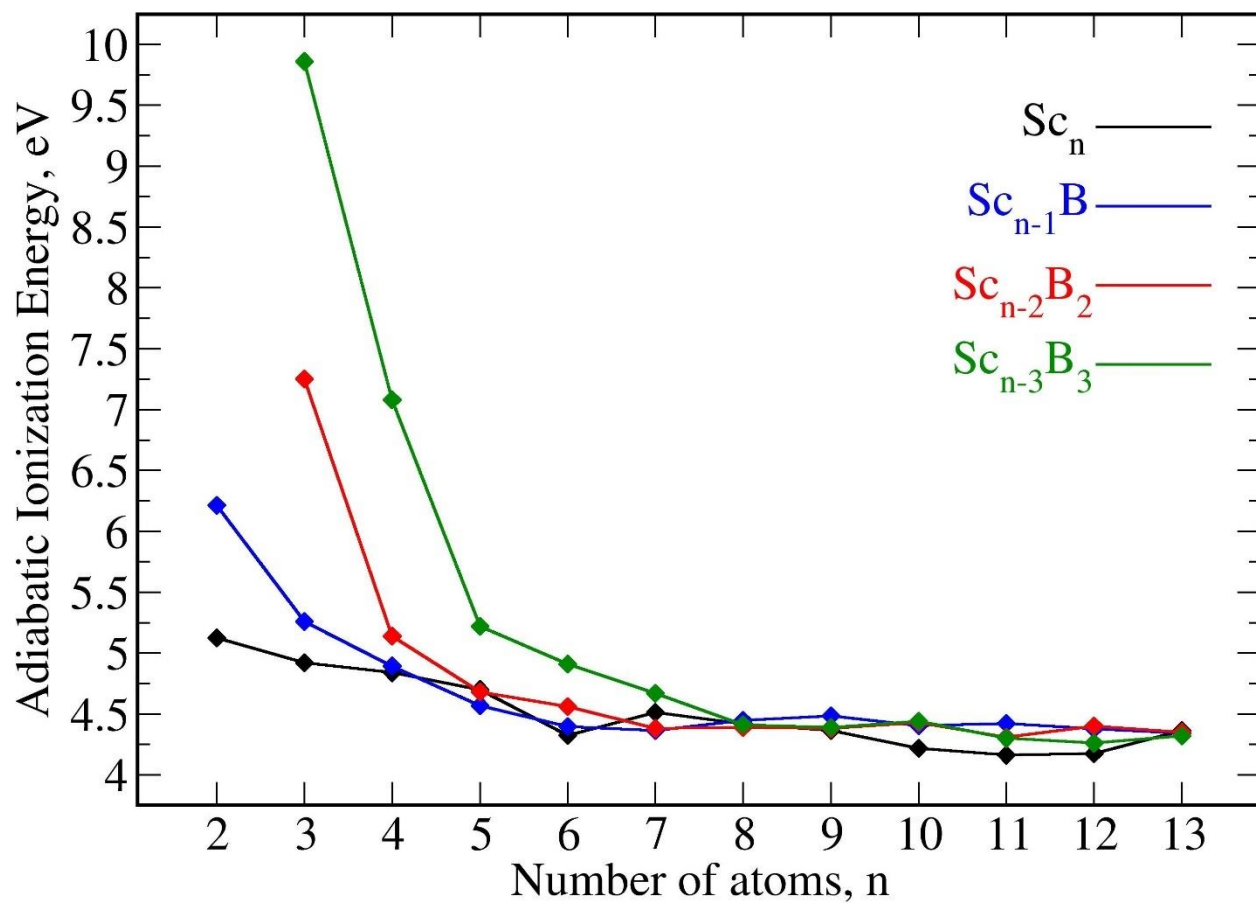

**Figure S10:** Adiabatic ionization energy of the  $B_mSc_{n-m}^{+/0}$  ( $m = 0-3$ ,  $n = 3-13$ ). Values given in eV from PBE/Def2-TZPV + ZPE computations.

**Table S1:** Natural Electron Configuration (NEC) and Natural Charge of **n.8.D.1**, **n.9.D.2** and **n.10.D.1** isomers at their most stable spin state.

| Isomers                           | Atom's number |    | Natural Charge | Natural Electron Configuration |
|-----------------------------------|---------------|----|----------------|--------------------------------|
| <p><b>n.8.D.1</b><br/>doublet</p> | 1             | Sc | 0.4            | 4S(0.64) 3d(1.66) 4p(0.32)     |
|                                   | 2             | Sc | 0.4            | 4S(0.64) 3d(1.66) 4p(0.32)     |
|                                   | 3             | Sc | 0.3            | 4S(0.63) 3d(1.73) 4p(0.32)     |
|                                   | 4             | Sc | 0.4            | 4S(0.64) 3d(1.66) 4p(0.32)     |
|                                   | 5             | Sc | 0.4            | 4S(0.65) 3d(1.60) 4p(0.32)     |
|                                   | 6             | Sc | 0.3            | 4S(0.63) 3d(1.73) 4p(0.32)     |
|                                   | 7             | Sc | 0.4            | 4S(0.64) 3d(1.66) 4p(0.32)     |
|                                   | 8             | Sc | 0.4            | 4S(0.65) 3d(1.60) 4p(0.32)     |
|                                   | 9             | B  | -1.4           | 2S(1.05) 2p(3.25)              |
|                                   | 10            | B  | -0.4           | 2S(0.68) 2p(2.57)              |
|                                   | 11            | B  | -1.4           | 2S(1.05) 2p(3.25)              |
| <p><b>n.9.D.2</b><br/>triplet</p> | 1             | Sc | 0.3            | 4S(0.62) 3d(1.79) 4p(0.32)     |
|                                   | 2             | Sc | 0.5            | 4S(0.60) 3d(1.62) 4p(0.30)     |
|                                   | 3             | Sc | 0.4            | 4S(0.58) 3d(1.68) 4p(0.33)     |
|                                   | 4             | Sc | 0.2            | 4S(0.62) 3d(1.80) 4p(0.33)     |
|                                   | 5             | Sc | 0.4            | 4S(0.91) 3d(1.54) 4p(0.15)     |
|                                   | 6             | Sc | 0.2            | 4S(0.62) 3d(1.80) 4p(0.33)     |
|                                   | 7             | Sc | 0.5            | 4S(0.59) 3d(1.63) 4p(0.30)     |
|                                   | 8             | Sc | 0.4            | 4S(0.58) 3d(1.68) 4p(0.33)     |
|                                   | 9             | Sc | 0.3            | 4S(0.62) 3d(1.79) 4p(0.32)     |
|                                   | 10            | B  | -0.6           | 2S(0.65) 2p(2.85)              |
|                                   | 11            | B  | -1.5           | 2S(0.80) 2p(3.50)              |
|                                   | 12            | B  | -1.3           | 2S(1.06) 2p(3.19)              |
| <p><b>n.10.D.1</b><br/>sextet</p> | 1             | Sc | 0.5            | 4S(0.92) 3d(1.51) 4p(0.14)     |
|                                   | 2             | Sc | 0.3            | 4S(0.60) 3d(1.75) 4p(0.32)     |
|                                   | 3             | Sc | 0.3            | 4S(0.60) 3d(1.75) 4p(0.32)     |
|                                   | 4             | Sc | 0.3            | 4S(0.60) 3d(1.75) 4p(0.32)     |
|                                   | 5             | Sc | 0.5            | 4S(0.92) 3d(1.51) 4p(0.14)     |
|                                   | 6             | Sc | 0.3            | 4S(0.60) 3d(1.75) 4p(0.32)     |
|                                   | 7             | Sc | 0.3            | 4S(0.60) 3d(1.75) 4p(0.32)     |
|                                   | 8             | Sc | 0.3            | 4S(0.60) 3d(1.75) 4p(0.32)     |
|                                   | 9             | Sc | 0.3            | 4S(0.60) 3d(1.75) 4p(0.32)     |
|                                   | 10            | Sc | 0.3            | 4S(0.60) 3d(1.75) 4p(0.32)     |
|                                   | 11            | B  | -0.6           | 2S(0.58) 2p(3.01)              |
|                                   | 12            | B  | -1.4           | 2S(0.80) 2p(3.55)              |
|                                   | 13            | B  | -1.4           | 2S(0.80) 2p(3.55)              |

**Table S2:** Natural Electron Configuration (NEC) and Natural Charge of **n.9.D.3** and **n.10.D.2** isomers at their most stable spin state.

| Isomers                                                                                                              | Atom's number |    | Natural Charge | Natural Electron Configuration |
|----------------------------------------------------------------------------------------------------------------------|---------------|----|----------------|--------------------------------|
| 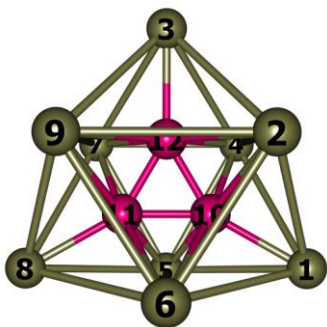 <p><b>n.9.D.3</b><br/>nonet</p>    | 1             | Sc | 0.5            | 4S(0.71) 3d(1.58) 4p(0.23)     |
|                                                                                                                      | 2             | Sc | 0.3            | 4S(0.58) 3d(1.78) 4p(0.32)     |
|                                                                                                                      | 3             | Sc | 0.4            | 4S(0.74) 3d(1.61) 4p(0.22)     |
|                                                                                                                      | 4             | Sc | 0.3            | 4S(0.59) 3d(1.78) 4p(0.34)     |
|                                                                                                                      | 5             | Sc | 0.3            | 4S(0.57) 3d(1.79) 4p(0.33)     |
|                                                                                                                      | 6             | Sc | 0.4            | 4S(0.58) 3d(1.74) 4p(0.31)     |
|                                                                                                                      | 7             | Sc | 0.3            | 4S(0.59) 3d(1.78) 4p(0.34)     |
|                                                                                                                      | 8             | Sc | 0.5            | 4S(0.71) 3d(1.58) 4p(0.23)     |
|                                                                                                                      | 9             | Sc | 0.3            | 4S(0.58) 3d(1.78) 4p(0.32)     |
|                                                                                                                      | 10            | B  | -1.1           | 2S(0.72) 2p(3.34)              |
|                                                                                                                      | 11            | B  | -1.1           | 2S(0.72) 2p(3.34)              |
|                                                                                                                      | 12            | B  | -1.1           | 2S(0.73) 2p(3.31)              |
|  <p><b>n.10.D.2</b><br/>sextet</p> | 1             | Sc | 0.5            | 4S(0.60) 3d(1.70) 4p(0.19)     |
|                                                                                                                      | 2             | Sc | 0.2            | 4S(0.61) 3d(1.93) 4p(0.31)     |
|                                                                                                                      | 3             | Sc | 0.5            | 4S(0.67) 3d(1.60) 4p(0.22)     |
|                                                                                                                      | 4             | Sc | 0.2            | 4S(0.61) 3d(1.88) 4p(0.29)     |
|                                                                                                                      | 5             | Sc | 0.2            | 4S(0.61) 3d(1.88) 4p(0.29)     |
|                                                                                                                      | 6             | Sc | 0.2            | 4S(0.61) 3d(1.93) 4p(0.31)     |
|                                                                                                                      | 7             | Sc | 0.2            | 4S(0.62) 3d(1.86) 4p(0.28)     |
|                                                                                                                      | 8             | Sc | 0.0            | 4S(0.58) 3d(2.04) 4p(0.35)     |
|                                                                                                                      | 9             | Sc | 0.5            | 4S(0.67) 3d(1.60) 4p(0.22)     |
|                                                                                                                      | 10            | Sc | 0.3            | 4S(0.60) 3d(1.80) 4p(0.25)     |
|                                                                                                                      | 11            | B  | -1.0           | 2S(0.72) 2p(3.26)              |
|                                                                                                                      | 12            | B  | -1.0           | 2S(0.73) 2p(3.20)              |
|                                                                                                                      | 13            | B  | -1.0           | 2S(0.73) 2p(3.20)              |

**Coordinates of the lowest-lying  $B_2Sc_{n-2}^{+/0}$  clusters with  $n = 3 - 13$**

| <b>Isomer</b>  | <b>Spin state</b> | <b>Coordinate</b> |             |              |              |
|----------------|-------------------|-------------------|-------------|--------------|--------------|
| <b>c.1.C.1</b> | triplet           | 21                | 0.000000000 | 0.000000000  | 0.629363000  |
|                |                   | 5                 | 0.000000000 | 0.790507000  | -1.321662000 |
|                |                   | 5                 | 0.000000000 | -0.790507000 | -1.321662000 |
| <b>n.1.C.1</b> | doublet           | 21                | 0.000000000 | 0.000000000  | 0.641103000  |
|                |                   | 5                 | 0.000000000 | 0.771613000  | -1.346317000 |
|                |                   | 5                 | 0.000000000 | -0.771613000 | -1.346317000 |

| <b>Isomer</b>  | <b>Spin state</b> | <b>Coordinate</b> |              |              |              |
|----------------|-------------------|-------------------|--------------|--------------|--------------|
| <b>c.2.C.1</b> | doublet           | 21                | 0.000000000  | 1.994506000  | 0.000000000  |
|                |                   | 21                | 0.000000000  | -1.994506000 | 0.000000000  |
|                |                   | 5                 | 0.000000000  | 0.000000000  | 0.796407000  |
|                |                   | 5                 | 0.000000000  | 0.000000000  | -0.796405000 |
| <b>n.2.C.1</b> | triplet           | 21                | -0.129960000 | -0.204950000 | 1.568562000  |
|                |                   | 21                | -0.129960000 | -0.204950000 | -1.568562000 |
|                |                   | 5                 | 1.221622000  | 0.432304000  | 0.000000000  |
|                |                   | 5                 | -0.129960000 | 1.289280000  | 0.000000000  |

| <b>Isomer</b>  | <b>Spin state</b> | <b>Coordinate</b> |              |              |              |
|----------------|-------------------|-------------------|--------------|--------------|--------------|
| <b>c.3.C.1</b> | singlet           | 21                | 0.000000000  | 1.870734000  | 0.000000000  |
|                |                   | 21                | 1.620104000  | -0.935367000 | 0.000000000  |
|                |                   | 21                | -1.620104000 | -0.935367000 | 0.000000000  |
|                |                   | 5                 | 0.000000000  | 0.000000000  | 1.018043000  |
|                |                   | 5                 | 0.000000000  | 0.000000000  | -1.018043000 |
| <b>n.3.C.1</b> | doublet           | 21                | 0.000000000  | 1.817443000  | 0.000000000  |
|                |                   | 21                | 1.573952000  | -0.908722000 | 0.000000000  |
|                |                   | 21                | -1.573952000 | -0.908722000 | 0.000000000  |
|                |                   | 5                 | 0.000000000  | 0.000000000  | 1.160991000  |
|                |                   | 5                 | 0.000000000  | 0.000000000  | -1.160991000 |

| <b>Isomer</b>  | <b>Spin state</b> | <b>Coordinate</b> |              |              |              |
|----------------|-------------------|-------------------|--------------|--------------|--------------|
| <b>c.4.C.1</b> | doublet           | 21                | 0.000004000  | -2.027284000 | 0.000000000  |
|                |                   | 21                | 2.027285000  | -0.000002000 | 0.000000000  |
|                |                   | 21                | -0.000003000 | 2.027292000  | 0.000000000  |
|                |                   | 21                | -2.027286000 | -0.000008000 | 0.000000000  |
|                |                   | 5                 | -0.000003000 | 0.000004000  | -1.026424000 |
|                |                   | 5                 | -0.000003000 | 0.000004000  | 1.026424000  |
| <b>n.4.C.1</b> | triplet           | 21                | 0.026405000  | -2.023598000 | 0.000000000  |
|                |                   | 21                | -0.051756000 | 2.036770000  | 0.000000000  |
|                |                   | 21                | -2.022785000 | 0.063868000  | 0.000000000  |
|                |                   | 21                | 2.035562000  | -0.089330000 | 0.000000000  |
|                |                   | 5                 | 0.026405000  | 0.025807000  | -1.003744000 |
|                |                   | 5                 | 0.026405000  | 0.025807000  | 1.003744000  |

| Isomer  | Spin state | Coordinate |              |              |              |
|---------|------------|------------|--------------|--------------|--------------|
| c.5.C.1 | singlet    | 21         | 1.751837000  | 0.000135000  | -1.477152000 |
|         |            | 21         | 1.578579000  | -0.000096000 | 1.353991000  |
|         |            | 21         | -0.292396000 | -2.021609000 | 0.158620000  |
|         |            | 21         | -0.292407000 | 2.021554000  | 0.158797000  |
|         |            | 21         | -2.492732000 | 0.000036000  | -0.265898000 |
|         |            | 5          | -0.720553000 | -0.000060000 | 1.054776000  |
|         |            | 5          | -0.341549000 | -0.000025000 | -0.753875000 |

|         |         |    |              |              |              |
|---------|---------|----|--------------|--------------|--------------|
| n.5.C.1 | quartet | 21 | -0.885358000 | 1.530564000  | -0.951485000 |
|         |         | 21 | -0.885438000 | -1.530502000 | -0.951497000 |
|         |         | 21 | 1.763694000  | -1.465633000 | 0.339216000  |
|         |         | 21 | 1.763745000  | 1.465563000  | 0.339252000  |
|         |         | 21 | -1.972284000 | 0.000009000  | 1.354581000  |
|         |         | 5  | 0.846333000  | -0.000004000 | -1.079030000 |
|         |         | 5  | 0.059355000  | -0.000004000 | 0.532746000  |

| Isomer  | Spin state  | Coordinate   |              |              |              |
|---------|-------------|--------------|--------------|--------------|--------------|
| c.6.C.1 | doublet     | 21           | -0.644949000 | 1.248359000  | 1.317501000  |
|         |             | 21           | 1.566857000  | -1.592298000 | -0.972219000 |
|         |             | 21           | -2.404659000 | 0.496618000  | -0.951224000 |
|         |             | 21           | 0.645187000  | 1.248425000  | -1.317459000 |
|         |             | 21           | 2.404721000  | 0.496349000  | 0.951292000  |
|         |             | 21           | -1.567154000 | -1.592187000 | 0.972095000  |
|         |             | 5            | -0.507123000 | -0.640945000 | -0.710228000 |
| 5       | 0.507105000 | -0.641171000 | 0.710287000  |              |              |

|         |              |              |              |              |              |
|---------|--------------|--------------|--------------|--------------|--------------|
| n.6.C.1 | triplet      | 21           | 1.889439000  | 1.226154000  | -0.847906000 |
|         |              | 21           | -1.042017000 | 1.747600000  | -0.921107000 |
|         |              | 21           | 0.372758000  | 0.805412000  | 1.772143000  |
|         |              | 21           | 1.889679000  | -1.472771000 | 0.399751000  |
|         |              | 21           | -2.298044000 | -0.230968000 | 0.741583000  |
|         |              | 21           | -0.781046000 | -1.752873000 | -1.280307000 |
|         |              | 5            | 0.158586000  | -0.052290000 | -0.286164000 |
| 5       | -0.287818000 | -1.302437000 | 0.856710000  |              |              |

| Isomer  | Spin state  | Coordinate   |              |              |              |
|---------|-------------|--------------|--------------|--------------|--------------|
| c.7.C.1 | quintet     | 21           | 0.065998000  | 0.793783000  | 2.112359000  |
|         |             | 21           | 0.065998000  | 0.793783000  | -2.112359000 |
|         |             | 21           | 0.065998000  | -2.092533000 | 1.471335000  |
|         |             | 21           | 0.065998000  | -2.092533000 | -1.471335000 |
|         |             | 21           | -0.885445000 | 2.793823000  | 0.000000000  |
|         |             | 21           | 2.388607000  | -0.328896000 | 0.000000000  |
|         |             | 21           | -1.998902000 | -0.076222000 | 0.000000000  |
|         |             | 5            | 0.743538000  | 1.256370000  | 0.000000000  |
| 5       | 0.229807000 | -0.379432000 | 0.000000000  |              |              |

|         |             |             |              |              |              |
|---------|-------------|-------------|--------------|--------------|--------------|
| n.7.C.1 | quartet     | 21          | 1.114052000  | 1.670402000  | 1.499746000  |
|         |             | 21          | 1.114052000  | -1.254381000 | 1.584346000  |
|         |             | 21          | -1.548069000 | 0.418856000  | -1.635983000 |
|         |             | 21          | 1.114052000  | 1.670402000  | -1.499746000 |
|         |             | 21          | 1.114052000  | -1.254381000 | -1.584346000 |
|         |             | 21          | -1.548069000 | 0.418856000  | 1.635983000  |
|         |             | 21          | -1.227798000 | -2.086479000 | 0.000000000  |
|         |             | 5           | -0.601886000 | 1.683457000  | 0.000000000  |
| 5       | 0.046351000 | 0.066782000 | 0.000000000  |              |              |

| Isomer         | Spin state   | Coordinate   |              |              |              |
|----------------|--------------|--------------|--------------|--------------|--------------|
| <b>c.8.C.1</b> | sextet       | 21           | 0.445815000  | 1.872601000  | -1.111426000 |
|                |              | 21           | 2.481830000  | -0.758139000 | -1.277101000 |
|                |              | 21           | 2.482478000  | 0.757260000  | 1.276819000  |
|                |              | 21           | -2.481647000 | 1.277528000  | -0.757880000 |
|                |              | 21           | 0.444361000  | -1.873331000 | 1.111680000  |
|                |              | 21           | -0.445512000 | -1.111326000 | -1.872843000 |
|                |              | 21           | -2.482671000 | -1.276493000 | 0.757658000  |
|                |              | 21           | -0.444632000 | 1.112011000  | 1.872928000  |
|                |              | 5            | 0.818260000  | -0.000531000 | 0.000316000  |
|                |              | 5            | -0.818356000 | 0.000069000  | 0.000376000  |
| <b>n.8.C.1</b> | quintet      | 21           | 1.205988000  | -1.492012000 | 1.566772000  |
|                |              | 21           | 1.205988000  | 1.491596000  | 1.566337000  |
|                |              | 21           | -1.166901000 | -2.540050000 | 0.000000000  |
|                |              | 21           | 1.205988000  | -1.492012000 | -1.566772000 |
|                |              | 21           | -1.499497000 | 0.000213000  | 1.592454000  |
|                |              | 21           | -1.167008000 | 2.540698000  | 0.000000000  |
|                |              | 21           | 1.205988000  | 1.491596000  | -1.566337000 |
|                |              | 21           | -1.499497000 | 0.000213000  | -1.592454000 |
|                |              | 5            | 1.950943000  | -0.000386000 | 0.000000000  |
|                |              | 5            | 0.186653000  | -0.000628000 | 0.000000000  |
| <b>c.9.C.1</b> | triplet      | 21           | 1.260467000  | 2.052693000  | 0.000000000  |
|                |              | 21           | -0.857370000 | 1.533406000  | -2.094556000 |
|                |              | 21           | 1.755815000  | -0.072125000 | -2.094317000 |
|                |              | 21           | 1.755815000  | -0.072125000 | 2.094317000  |
|                |              | 21           | -0.857370000 | 1.533406000  | 2.094556000  |
|                |              | 21           | -0.857370000 | -1.395359000 | -1.469642000 |
|                |              | 21           | -0.857370000 | -1.395359000 | 1.469642000  |
|                |              | 21           | 1.520038000  | -2.473144000 | 0.000000000  |
|                |              | 21           | -2.893080000 | 0.239272000  | 0.000000000  |
|                |              | 5            | 0.785574000  | -0.339678000 | 0.000000000  |
| 5              | -0.657799000 | 0.546882000  | 0.000000000  |              |              |
| <b>n.9.C.1</b> | doublet      | 21           | -2.071346000 | 1.574844000  | 1.206108000  |
|                |              | 21           | 0.148267000  | 2.368940000  | -0.788458000 |
|                |              | 21           | -2.688747000 | -0.708230000 | -0.860692000 |
|                |              | 21           | 0.000053000  | 0.000340000  | -2.457160000 |
|                |              | 21           | 2.688908000  | 0.708051000  | -0.860501000 |
|                |              | 21           | 2.071120000  | -1.574989000 | 1.206212000  |
|                |              | 21           | 0.925554000  | 1.138787000  | 1.708052000  |
|                |              | 21           | -0.925808000 | -1.139124000 | 1.707648000  |
|                |              | 21           | -0.148000000 | -2.368663000 | -0.788975000 |
|                |              | 5            | -0.791317000 | 0.250911000  | -0.151711000 |
| 5              | 0.791312000  | -0.250729000 | -0.151675000 |              |              |

| Isomer   | Spin state   | Coordinate |              |              |              |
|----------|--------------|------------|--------------|--------------|--------------|
| c.10.C.1 | doublet      | 21         | -3.074437000 | -0.660105000 | -0.617610000 |
|          |              | 21         | -1.915770000 | 2.047195000  | -0.284911000 |
|          |              | 21         | -1.787089000 | -0.421146000 | 2.104755000  |
|          |              | 21         | -0.589990000 | -0.111741000 | -2.203756000 |
|          |              | 21         | 1.178540000  | -1.234518000 | 1.766740000  |
|          |              | 21         | -0.633422000 | -2.282512000 | -0.263335000 |
|          |              | 21         | 0.441133000  | 1.610648000  | 1.602701000  |
|          |              | 21         | 2.186928000  | -1.663677000 | -1.270071000 |
|          |              | 21         | 1.042236000  | 2.128735000  | -1.188429000 |
|          |              | 21         | 3.098838000  | 0.590267000  | 0.374967000  |
|          |              | 5          | -0.695926000 | 0.088377000  | 0.171316000  |
|          |              | 5          | 0.918660000  | -0.101594000 | -0.259736000 |
|          |              | n.10.C.1   | triplet      | 21           | -0.557769000 |
| 21       | -0.558178000 |            |              | -1.749745000 | -1.437780000 |
| 21       | 2.196390000  |            |              | -2.073823000 | -0.002194000 |
| 21       | -1.919325000 |            |              | 1.260218000  | 1.610242000  |
| 21       | -1.920163000 |            |              | 1.264442000  | -1.606627000 |
| 21       | -3.065865000 |            |              | -0.971496000 | -0.000791000 |
| 21       | 1.142102000  |            |              | 0.483220000  | -2.202639000 |
| 21       | 0.408483000  |            |              | 2.269663000  | 0.002755000  |
| 21       | 1.143404000  |            |              | 0.477630000  | 2.203211000  |
| 21       | 3.092616000  |            |              | 0.816723000  | 0.000206000  |
| 5        | -0.732313000 |            |              | 0.157185000  | 0.000041000  |
| 5        | 0.893195000  |            |              | -0.257595000 | -0.000596000 |
| c.11.C.1 | septet       |            |              | 21           | -2.655531000 |
|          |              | 21         | 0.376936000  | -2.736347000 | 0.000131000  |
|          |              | 21         | -2.609975000 | 1.286091000  | 1.500221000  |
|          |              | 21         | 2.318164000  | -0.826938000 | 1.511517000  |
|          |              | 21         | -2.609963000 | 1.285901000  | -1.500396000 |
|          |              | 21         | 2.318181000  | -0.827108000 | -1.511416000 |
|          |              | 21         | -0.638155000 | -0.907440000 | -2.110388000 |
|          |              | 21         | 3.218871000  | 1.644637000  | -0.000075000 |
|          |              | 21         | 0.518671000  | 1.648845000  | -1.496375000 |
|          |              | 21         | 0.518645000  | 1.649009000  | 1.496199000  |
|          |              | 21         | -0.638173000 | -0.907197000 | 2.110501000  |
|          |              | 5          | 0.521861000  | -0.300663000 | 0.000017000  |
|          |              | 5          | -1.016082000 | 0.426322000  | -0.000026000 |
| n.11.C.1 | octet        | 21         | 2.679015000  | 1.417092000  | -0.000538000 |
|          |              | 21         | 0.603517000  | 0.908249000  | -2.088705000 |
|          |              | 21         | -2.375085000 | 0.804476000  | -1.535667000 |
|          |              | 21         | 0.603021000  | 0.910550000  | 2.087779000  |
|          |              | 21         | -2.375554000 | 0.806926000  | 1.534331000  |
|          |              | 21         | -0.500676000 | 2.655295000  | -0.001571000 |
|          |              | 21         | -3.066044000 | -1.657023000 | 0.000765000  |
|          |              | 21         | -0.428215000 | -1.717487000 | 1.515856000  |
|          |              | 21         | 2.610007000  | -1.184108000 | 1.483884000  |
|          |              | 21         | 2.610638000  | -1.185198000 | -1.481951000 |
|          |              | 21         | -0.427318000 | -1.719522000 | -1.514212000 |
|          |              | 5          | -0.680166000 | 0.166409000  | -0.000176000 |
|          |              | 5          | 0.960284000  | -0.331259000 | 0.000299000  |



**Coordinates of the lowest-lying B<sub>3</sub>Sc<sub>n-3</sub><sup>+0</sup> clusters with n = 4 - 13**

| <b>Isomer</b>  | <b>Spin state</b> | <b>Coordinate</b> |              |              |              |
|----------------|-------------------|-------------------|--------------|--------------|--------------|
| <b>c.1.D.1</b> | doublet           | 21                | 1.023971000  | -0.006918000 | -0.000054000 |
|                |                   | 5                 | -0.915986000 | 0.820967000  | 0.000302000  |
|                |                   | 5                 | -2.309392000 | 0.056556000  | -0.000346000 |
|                |                   | 5                 | -1.075302000 | -0.848466000 | 0.000271000  |
| <b>c.1.D.2</b> | doublet           | 21                | 0.886353000  | -0.000073000 | -0.041573000 |
|                |                   | 5                 | -1.089917000 | 0.819181000  | 0.468952000  |
|                |                   | 5                 | -1.090587000 | -0.818741000 | 0.469343000  |
|                |                   | 5                 | -1.542179000 | -0.000132000 | -0.763687000 |
| <b>n.1.D.1</b> | singlet           | 21                | -0.966938000 | -0.000003000 | 0.000031000  |
|                |                   | 5                 | 0.940401000  | -0.911439000 | -0.000164000 |
|                |                   | 5                 | 0.940293000  | 0.911387000  | -0.000164000 |
|                |                   | 5                 | 2.180446000  | 0.000063000  | 0.000198000  |
| <b>c.2.D.1</b> | singlet           | 21                | 2.175850000  | -0.292061000 | 0.000000000  |
|                |                   | 21                | -2.175851000 | -0.292051000 | 0.000000000  |
|                |                   | 5                 | 0.791913000  | 1.316201000  | 0.000000000  |
|                |                   | 5                 | 0.000000000  | -0.179139000 | 0.000000000  |
|                |                   | 5                 | -0.791909000 | 1.316209000  | 0.000000000  |
| <b>n.2.D.1</b> | doublet           | 21                | 1.544076000  | -0.319121000 | -0.000004000 |
|                |                   | 21                | -1.544074000 | -0.319123000 | -0.000004000 |
|                |                   | 5                 | -0.000006000 | 1.507227000  | 0.000020000  |
|                |                   | 5                 | 0.000002000  | 0.586681000  | 1.276217000  |
|                |                   | 5                 | -0.000001000 | 0.586719000  | -1.276203000 |
| <b>c.3.D.1</b> | doublet           | 21                | -1.995880000 | 0.528928000  | 0.000000000  |
|                |                   | 21                | 2.011737000  | 0.512501000  | -0.000001000 |
|                |                   | 21                | -0.020395000 | -1.570814000 | -0.000003000 |
|                |                   | 5                 | 0.026418000  | 0.366363000  | 1.165419000  |
|                |                   | 5                 | 0.026412000  | 0.366396000  | -1.165418000 |
|                |                   | 5                 | -0.033771000 | 1.490659000  | 0.000014000  |
| <b>n.3.D.1</b> | singlet           | 21                | -0.000043000 | -1.569490000 | -0.000001000 |
|                |                   | 21                | 1.972464000  | 0.518271000  | 0.000004000  |
|                |                   | 21                | -1.972442000 | 0.518318000  | 0.000003000  |
|                |                   | 5                 | 0.000029000  | 0.366682000  | 1.194088000  |
|                |                   | 5                 | 0.000033000  | 0.366673000  | -1.194088000 |
|                |                   | 5                 | 0.000027000  | 1.504828000  | -0.000022000 |

| Isomer  | Spin state   | Coordinate   |              |              |              |
|---------|--------------|--------------|--------------|--------------|--------------|
| c.4.D.1 | singlet      | 21           | 0.788865000  | -1.820807000 | 0.455506000  |
|         |              | 21           | -0.788946000 | 1.820822000  | 0.455465000  |
|         |              | 21           | -2.140250000 | -0.642859000 | -0.627611000 |
|         |              | 21           | 2.140316000  | 0.642813000  | -0.627592000 |
|         |              | 5            | -0.783232000 | -0.324894000 | 1.033891000  |
|         |              | 5            | 0.000018000  | 0.000009000  | -0.621991000 |
|         |              | 5            | 0.783270000  | 0.325012000  | 1.033874000  |
| n.4.D.1 | doublet      | 21           | -2.277390000 | 0.215641000  | -0.539967000 |
|         |              | 21           | 2.184978000  | -0.336204000 | -0.568727000 |
|         |              | 21           | -0.269993000 | -1.915198000 | 0.409375000  |
|         |              | 21           | 0.386444000  | 1.983226000  | 0.338889000  |
|         |              | 5            | -0.040356000 | 0.046516000  | -0.633682000 |
|         |              | 5            | -0.861869000 | 0.228728000  | 1.068907000  |
|         |              | 5            | 0.801257000  | -0.054600000 | 1.078580000  |
| c.5.D.1 | doublet      | 21           | -0.683611000 | 1.738333000  | -0.000409000 |
|         |              | 21           | 1.753044000  | -1.691114000 | 0.000333000  |
|         |              | 21           | -1.750866000 | -0.443749000 | -1.595969000 |
|         |              | 21           | -1.750836000 | -0.442752000 | 1.596216000  |
|         |              | 21           | 2.273910000  | 1.097552000  | -0.000211000 |
|         |              | 5            | 0.544920000  | -0.009764000 | 0.934306000  |
|         |              | 5            | -0.424609000 | -1.064853000 | 0.000215000  |
|         |              | 5            | 0.544790000  | -0.010112000 | -0.934356000 |
|         |              | 21           | 0.098670000  | -2.273263000 | -0.156030000 |
|         |              | 21           | 0.987703000  | -0.004497000 | 1.643823000  |
|         |              | 21           | -2.428098000 | 0.010953000  | -0.486030000 |
|         |              | 21           | 0.119212000  | 2.272294000  | -0.155995000 |
|         |              | 21           | 1.795024000  | -0.008091000 | -1.257006000 |
|         |              | 5            | -1.080207000 | 0.859748000  | 1.031035000  |
| 5       | -0.236421000 | 0.001145000  | -0.334860000 |              |              |
| 5       | -1.087917000 | -0.849960000 | 1.031026000  |              |              |
| c.6.D.1 | triplet      | 21           | 1.580503000  | 0.000010000  | 1.573252000  |
|         |              | 21           | 1.538724000  | -1.621733000 | -0.862848000 |
|         |              | 21           | -1.580503000 | -0.000010000 | 1.573252000  |
|         |              | 21           | -1.538724000 | 1.621733000  | -0.862848000 |
|         |              | 21           | -1.538696000 | -1.621785000 | -0.862816000 |
|         |              | 21           | 1.538696000  | 1.621785000  | -0.862816000 |
|         |              | 5            | 0.000000000  | -1.499362000 | 0.740747000  |
|         |              | 5            | 0.000000000  | 1.499362000  | 0.740747000  |
|         |              | 5            | 0.000000000  | 0.000000000  | -0.201233000 |
|         |              | 21           | -1.505820000 | 1.580383000  | 0.900491000  |
|         |              | 21           | -1.505894000 | -1.580280000 | 0.900664000  |
|         |              | 21           | -1.537526000 | -0.000063000 | -1.636758000 |
|         |              | 21           | 1.537498000  | -0.000150000 | -1.636767000 |
|         |              | 21           | 1.505889000  | -1.580316000 | 0.900625000  |
| 21      | 1.505859000  | 1.580443000  | 0.900483000  |              |              |
| 5       | 0.000023000  | 0.000025000  | 0.126016000  |              |              |
| 5       | 0.000016000  | 1.518799000  | -0.753464000 |              |              |
| 5       | -0.000062000 | -1.518894000 | -0.753253000 |              |              |
| n.6.D.1 | quartet      | 21           | -1.505820000 | 1.580383000  | 0.900491000  |
|         |              | 21           | -1.505894000 | -1.580280000 | 0.900664000  |
|         |              | 21           | -1.537526000 | -0.000063000 | -1.636758000 |
|         |              | 21           | 1.537498000  | -0.000150000 | -1.636767000 |
|         |              | 21           | 1.505889000  | -1.580316000 | 0.900625000  |
|         |              | 21           | 1.505859000  | 1.580443000  | 0.900483000  |
|         |              | 5            | 0.000023000  | 0.000025000  | 0.126016000  |
|         |              | 5            | 0.000016000  | 1.518799000  | -0.753464000 |
|         |              | 5            | -0.000062000 | -1.518894000 | -0.753253000 |

| Isomer         | Spin state   | Coordinate     |              |              |              |              |              |
|----------------|--------------|----------------|--------------|--------------|--------------|--------------|--------------|
| <b>c.7.D.1</b> | doublet      | 21             | -1.103722000 | -1.331245000 | 1.515663000  |              |              |
|                |              | 21             | -1.103722000 | 1.715340000  | 1.509935000  |              |              |
|                |              | 21             | -1.103722000 | 1.715340000  | -1.509935000 |              |              |
|                |              | 21             | 1.668968000  | 0.452862000  | 1.515580000  |              |              |
|                |              | 21             | -1.103722000 | -1.331245000 | -1.515663000 |              |              |
|                |              | 21             | 1.668968000  | 0.452862000  | -1.515580000 |              |              |
|                |              | 21             | 1.393732000  | -2.166285000 | 0.000000000  |              |              |
|                |              | 5              | 0.634030000  | 1.771727000  | 0.000000000  |              |              |
|                |              | 5              | -1.875069000 | 0.157169000  | 0.000000000  |              |              |
|                |              | 5              | -0.089427000 | 0.139061000  | 0.000000000  |              |              |
| <b>n.7.D.1</b> | triplet      | 21             | 1.482261000  | 0.676940000  | -1.597739000 |              |              |
|                |              | 21             | -0.781994000 | -1.429591000 | -1.597721000 |              |              |
|                |              | 21             | 1.771943000  | -1.904536000 | 0.000000000  |              |              |
|                |              | 21             | -0.267615000 | 2.527020000  | 0.000000000  |              |              |
|                |              | 21             | -2.501236000 | 0.448972000  | 0.000000000  |              |              |
|                |              | 21             | -0.781994000 | -1.429591000 | 1.597721000  |              |              |
|                |              | 21             | 1.482261000  | 0.676940000  | 1.597739000  |              |              |
|                |              | 5              | -0.131241000 | 0.140954000  | 0.000000000  |              |              |
|                |              | 5              | -0.781994000 | 0.840604000  | 1.502502000  |              |              |
|                |              | 5              | -0.781994000 | 0.840604000  | -1.502502000 |              |              |
| <b>c.8.D.1</b> | singlet      | 21             | -1.300742000 | 1.546487000  | 1.546496000  |              |              |
|                |              | 21             | -1.300742000 | -1.546490000 | 1.546494000  |              |              |
|                |              | 21             | 1.300749000  | 2.187079000  | 0.000000000  |              |              |
|                |              | 21             | -1.300742000 | 1.546487000  | -1.546496000 |              |              |
|                |              | 21             | 1.300750000  | 0.000002000  | 2.187077000  |              |              |
|                |              | 21             | 1.300748000  | -2.187076000 | 0.000000000  |              |              |
|                |              | 21             | -1.300742000 | -1.546490000 | -1.546494000 |              |              |
|                |              | 21             | 1.300750000  | 0.000002000  | -2.187077000 |              |              |
|                |              | 5              | -1.784248000 | 0.000001000  | 0.000000000  |              |              |
|                |              | 5              | -0.000071000 | -0.000004000 | 0.000000000  |              |              |
|                |              | 5              | 1.784190000  | 0.000001000  | 0.000000000  |              |              |
|                |              | <b>n.8.D.1</b> | doublet      | 21           | -2.006081000 | -0.289377000 | 1.528432000  |
|                |              |                |              | 21           | 0.679064000  | -1.909750000 | 1.528462000  |
|                |              |                |              | 21           | -1.225148000 | 2.202571000  | 0.000000000  |
|                |              |                |              | 21           | -2.006081000 | -0.289377000 | -1.528432000 |
| 21             | 0.679064000  |                |              | 1.125344000  | 2.186142000  |              |              |
| 21             | 2.519732000  |                |              | -0.057204000 | 0.000000000  |              |              |
| 21             | 0.679064000  |                |              | -1.909750000 | -1.528462000 |              |              |
| 21             | 0.679064000  |                |              | 1.125344000  | -2.186142000 |              |              |
| 5              | -0.930571000 |                |              | -1.542248000 | 0.000000000  |              |              |
| 5              | 0.001100000  |                |              | 0.002005000  | 0.000000000  |              |              |
| 5              | 0.935023000  |                |              | 1.549476000  | 0.000000000  |              |              |
| <b>n.8.D.2</b> | quartet      |                |              | 21           | -0.073641000 | -1.629286000 | 1.556276000  |
|                |              |                |              | 21           | 1.368230000  | -1.492734000 | -1.185092000 |
|                |              |                |              | 21           | -1.710468000 | -1.534517000 | -1.172407000 |
|                |              |                |              | 21           | 1.368203000  | 1.492910000  | -1.184944000 |
|                |              | 21             | -2.648722000 | -0.000100000 | 1.214278000  |              |              |
|                |              | 21             | -0.073699000 | 1.629114000  | 1.556474000  |              |              |
|                |              | 21             | 3.315846000  | -0.000045000 | 0.720661000  |              |              |
|                |              | 21             | -1.710499000 | 1.534624000  | -1.172233000 |              |              |
|                |              | 5              | -0.192394000 | 0.000118000  | -1.940909000 |              |              |
|                |              | 5              | -0.304716000 | 0.000019000  | -0.128856000 |              |              |
|                |              | 5              | 1.189058000  | 0.000009000  | 0.671111000  |              |              |

| Isomer         | Spin state   | Coordinate     |              |              |              |
|----------------|--------------|----------------|--------------|--------------|--------------|
| <b>c.9.D.1</b> | sextet       | 21             | 3.266452000  | 0.001348000  | 0.002756000  |
|                |              | 21             | 0.935745000  | -0.290064000 | 2.221204000  |
|                |              | 21             | 0.942484000  | -2.217799000 | -0.288878000 |
|                |              | 21             | 0.938239000  | 2.218981000  | 0.292804000  |
|                |              | 21             | -1.665384000 | 1.322553000  | 1.719771000  |
|                |              | 21             | -1.658878000 | 1.721774000  | -1.326492000 |
|                |              | 21             | 0.944791000  | 0.291673000  | -2.215276000 |
|                |              | 21             | -1.661803000 | -1.724049000 | 1.320183000  |
|                |              | 21             | -1.655572000 | -1.324304000 | -1.725823000 |
|                |              | 5              | 1.159885000  | 0.000802000  | 0.003294000  |
|                |              | 5              | -0.502414000 | 0.000260000  | 0.000044000  |
|                |              | 5              | -2.278981000 | -0.001528000 | -0.004379000 |
|                |              | <b>c.9.D.2</b> | sextet       | 21           | 0.969006000  |
| 21             | -1.653678000 |                |              | 1.559744000  | -1.537232000 |
| 21             | -1.686102000 |                |              | -1.529961000 | -1.535494000 |
| 21             | 0.904143000  |                |              | -2.262589000 | 0.004607000  |
| 21             | 3.272100000  |                |              | -0.015237000 | -0.001119000 |
| 21             | 0.957883000  |                |              | 0.003966000  | 2.233562000  |
| 21             | -1.685764000 |                |              | -1.523475000 | 1.541712000  |
| 21             | -1.653371000 |                |              | 1.566202000  | 1.530433000  |
| 21             | 0.957714000  |                |              | -0.005622000 | -2.231849000 |
| 5              | -0.496583000 |                |              | 0.003504000  | -0.000513000 |
| 5              | 1.160938000  |                |              | -0.042344000 | 0.001476000  |
| 5              | -2.268468000 |                |              | 0.022478000  | 0.000059000  |
| <b>n.9.D.1</b> | triplet      |                |              | 21           | -1.620631000 |
|                |              | 21             | 1.484484000  | -2.286267000 | -0.480014000 |
|                |              | 21             | 2.377729000  | -0.095691000 | 1.587339000  |
|                |              | 21             | 1.802124000  | 2.069852000  | -0.552310000 |
|                |              | 21             | -1.343927000 | 2.044244000  | -1.145445000 |
|                |              | 21             | -2.942840000 | 0.190902000  | 0.846190000  |
|                |              | 21             | -0.298835000 | 1.528820000  | 1.635537000  |
|                |              | 21             | -0.472748000 | -1.430110000 | 1.668562000  |
|                |              | 21             | 0.544253000  | -0.074605000 | -2.286434000 |
|                |              | 5              | 0.695694000  | -0.001303000 | 0.070726000  |
|                |              | 5              | -0.961167000 | 0.039886000  | -0.166649000 |
|                |              | 5              | 2.241114000  | -0.151528000 | -0.728882000 |
|                |              | <b>n.9.D.2</b> | triplet      | 21           | 0.916121000  |
| 21             | -1.702378000 |                |              | -0.002603000 | 2.159633000  |
| 21             | -1.633529000 |                |              | 2.183075000  | -0.011170000 |
| 21             | 0.958048000  |                |              | 1.594494000  | -1.549654000 |
| 21             | 3.269677000  |                |              | -0.000386000 | 0.022768000  |
| 21             | 0.957874000  |                |              | -1.590710000 | -1.553386000 |
| 21             | -1.654340000 |                |              | 0.002909000  | -2.193317000 |
| 21             | -1.633900000 |                |              | -2.182950000 | -0.016688000 |
| 21             | 0.916619000  |                |              | 1.607054000  | 1.572256000  |
| 5              | -0.513139000 |                |              | -0.000114000 | -0.001100000 |
| 5              | 1.151513000  |                |              | -0.000247000 | 0.030583000  |
| 5              | -2.293980000 |                |              | 0.000238000  | -0.025510000 |

| Isomer          | Spin state | Coordinate |              |              |              |
|-----------------|------------|------------|--------------|--------------|--------------|
| <b>c.10.D.1</b> | quintet    | 21         | 0.001102000  | 1.023979000  | -2.131832000 |
|                 |            | 21         | -0.002231000 | -2.011099000 | -1.797326000 |
|                 |            | 21         | -0.002705000 | -2.314315000 | 1.041934000  |
|                 |            | 21         | 1.536777000  | 0.237801000  | 1.958926000  |
|                 |            | 21         | -2.415134000 | 1.442191000  | -0.455410000 |
|                 |            | 21         | -1.536682000 | 0.240973000  | 1.958853000  |
|                 |            | 21         | -2.739693000 | -1.603677000 | -0.147193000 |
|                 |            | 21         | 2.736087000  | -1.609681000 | -0.146985000 |
|                 |            | 21         | 2.418534000  | 1.436556000  | -0.455328000 |
|                 |            | 21         | 0.003966000  | 3.132976000  | 0.245529000  |
|                 |            | 5          | 0.000960000  | 0.959849000  | 0.242941000  |
|                 |            | 5          | 0.859069000  | -0.429894000 | -0.270899000 |
|                 |            | 5          | -0.860120000 | -0.427911000 | -0.270952000 |
| <b>n.10.D.1</b> | sextet     | 21         | 0.000000000  | 0.000000000  | 3.747262000  |
|                 |            | 21         | 1.574625000  | 1.574625000  | -1.309184000 |
|                 |            | 21         | 0.000000000  | 2.226856000  | 1.309184000  |
|                 |            | 5          | 0.000000000  | 0.000000000  | 1.650032000  |
|                 |            | 21         | 2.226856000  | 0.000000000  | 1.309184000  |
|                 |            | 21         | 0.000000000  | 0.000000000  | -3.747262000 |
|                 |            | 21         | 0.000000000  | -2.226856000 | 1.309184000  |
|                 |            | 21         | -1.574625000 | 1.574625000  | -1.309184000 |
|                 |            | 5          | 0.000000000  | 0.000000000  | -1.650032000 |
|                 |            | 21         | -1.574625000 | -1.574625000 | -1.309184000 |
|                 |            | 21         | -2.226856000 | 0.000000000  | 1.309184000  |
|                 |            | 21         | 1.574625000  | -1.574625000 | -1.309184000 |
|                 |            | 5          | 0.000000000  | 0.000000000  | 0.000000000  |
| <b>n.10.D.2</b> | sextet     | 21         | 0.000395000  | 3.120711000  | -0.293406000 |
|                 |            | 21         | -2.384653000 | 1.423058000  | 0.442743000  |
|                 |            | 21         | -2.744124000 | -1.605201000 | 0.180420000  |
|                 |            | 21         | -1.512616000 | 0.204400000  | -1.982609000 |
|                 |            | 21         | 1.513599000  | 0.200152000  | -1.983191000 |
|                 |            | 21         | 2.386233000  | 1.422054000  | 0.439617000  |
|                 |            | 21         | 0.002471000  | 1.092514000  | 2.144667000  |
|                 |            | 21         | -0.000924000 | -2.306050000 | -1.042661000 |
|                 |            | 21         | 2.741756000  | -1.607984000 | 0.183224000  |
|                 |            | 21         | -0.002064000 | -1.964816000 | 1.827568000  |
|                 |            | 5          | 0.000213000  | 0.955797000  | -0.222446000 |
|                 |            | 5          | 0.861870000  | -0.433490000 | 0.286834000  |
|                 |            | 5          | -0.862383000 | -0.433421000 | 0.286844000  |
| <b>n.10.D.3</b> | dectet     | 21         | 0.152134000  | -2.176828000 | 0.847509000  |
|                 |            | 21         | 2.640219000  | -1.432171000 | -0.647915000 |
|                 |            | 21         | -0.213648000 | -1.479707000 | -1.952585000 |
|                 |            | 21         | -2.679441000 | -1.543755000 | -0.119930000 |
|                 |            | 21         | -0.213679000 | 1.479796000  | -1.952531000 |
|                 |            | 21         | -1.292244000 | -0.000047000 | 2.245490000  |
|                 |            | 21         | 1.968669000  | -0.000025000 | 1.960412000  |
|                 |            | 21         | 2.640193000  | 1.432210000  | -0.647884000 |
|                 |            | 21         | -2.679461000 | 1.543729000  | -0.119872000 |
|                 |            | 21         | 0.152117000  | 2.176792000  | 0.847590000  |
|                 |            | 5          | -1.919019000 | 0.000019000  | -1.610942000 |
|                 |            | 5          | -0.885274000 | 0.000004000  | -0.135757000 |
|                 |            | 5          | 0.809878000  | -0.000002000 | -0.186490000 |

## References

1. Nguyen-Ha, B.-N.; Tam, N. M.; Pham-Ho, M. P.; Nguyen, M. T., Boron-doped scandium clusters  $B@Sc_{n-1}^{-/0/+}$  with  $n = 2-13$ : uncovering the smallest endohedrally doped cages. *RSC Adv.* **2024**, *14* (47), 34718-34732.
